# Supplementary material
Source: publisher figshare collection journal article supplement (https://acs.figshare.com/ndownloader/files/14248133)
Supplement: Supplementary file 1 [file 14248133]

## Supporting Information for

### Large Negative Thermal Expansion Induced by Synergistic Effects of Ferroelectrostriction and Spin Crossover in PbTiO<sub>3</sub>-Based Perovskites

Zhao Pan,<sup>1,2</sup> Jun Chen,<sup>3,4,\*</sup> Runze Yu,<sup>2</sup> Lokanath Patra,<sup>5,6</sup> Ponniah Ravindran,<sup>5,6</sup> Andrea Sanson,<sup>7</sup> Ruggero Milazzo,<sup>7</sup> Alberto Carnera,<sup>7</sup> Lei Hu,<sup>4</sup> Lu Wang,<sup>4</sup> Hajime Yamamoto,<sup>2</sup> Yang Ren,<sup>8</sup> Qingzhen Huang,<sup>9</sup> Yuki Sakai,<sup>2</sup> Takumi Nishikubo,<sup>2</sup> Takahiro Ogata,<sup>2</sup> Xi'an Fan,<sup>1</sup> Yawei Li,<sup>1</sup> Guangqiang Li,<sup>1</sup> Hajime Hojo,<sup>2</sup> Masaki Azuma,<sup>2</sup> and Xianran Xing<sup>3,4</sup>

<sup>1</sup>State Key Laboratory of Refractories and Metallurgy, Wuhan University of Science and Technology, Wuhan 430081, China

<sup>2</sup>Laboratory for Materials and Structures, Tokyo Institute of Technology, 4259 Nagatsuta, Midori, Yokohama, 226-8503, Japan

<sup>3</sup>Beijing Advanced Innovation Center for Materials Genome Engineering, University of Science and Technology Beijing, Beijing 100083, China

<sup>4</sup>Department of Physical Chemistry, University of Science and Technology Beijing, Beijing 100083, China

<sup>5</sup>Department of Physics, Central University of Tamil Nadu, Thiruvavur, 610101, India

<sup>6</sup>Simulation Center for Atomic and Nanoscale MATerials (SCANMAT), Central University of Tamil Nadu, Thiruvavur, Tamil Nadu, 610101, India

<sup>7</sup>Department of Physics and Astronomy, University of Padova, Padova I-35131, Italy

<sup>8</sup>X-ray Science Division, Argonne National Laboratory, Argonne, Illinois 60439, United States

<sup>9</sup>Center for Neutron Research, National Institute of Standards and Technology (NIST), Gaithersburg, Maryland 20899-6102, United States

\*Corresponding author: [junchen@ustb.edu.cn](mailto:junchen@ustb.edu.cn)

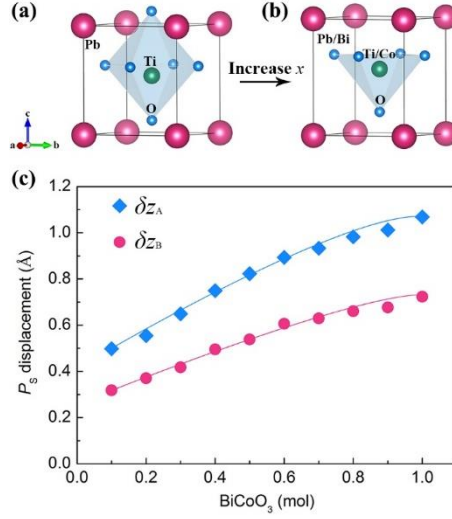

**Figure S1.** Crystal structure in  $ABO_3$  perovskite-type ferroelectric of  $(1-x)PT-xBC$  at RT. The normal (a)  $BO_6$  octahedron is transformed to (b)  $BO_5$  pyramidal coordination with the increase in  $x$ . (c)  $P_s$  displacement of  $\delta_{Z_A}$  and  $\delta_{Z_B}$  of  $(1-x)PT-xBC$  as a function of  $x$ . The error bars are smaller than the symbols.

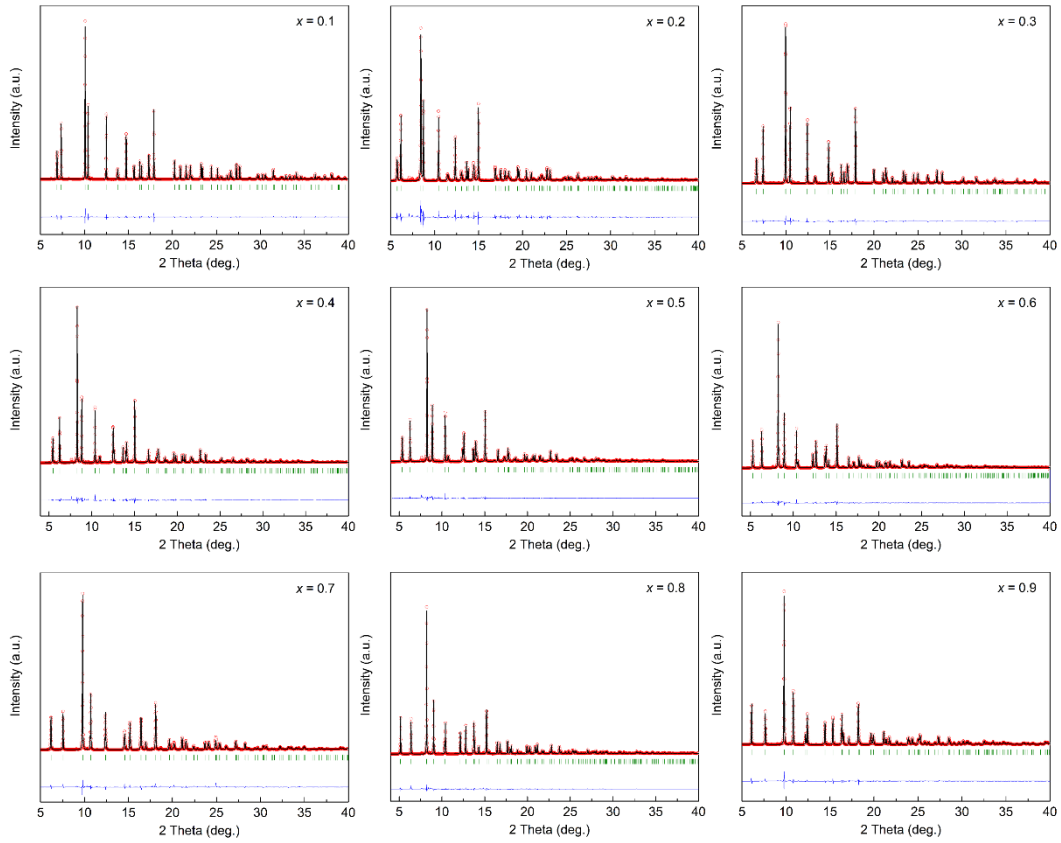

**Figure S2.** Rietveld refinement of SXRD patterns of tetragonal  $(1-x)PT-xBC$  ( $x = 0.1-0.9$ ) at room temperature. Observed (red circles), calculated (black line), and their difference profiles (bottom line) are shown. The Bragg reflection positions are indicated by the green ticks. The related wavelength ( $\lambda$ ) is 0.419552 Å for  $x = 0.2, 0.4, 0.5, 0.6, 0.8$ , and 0.500000 Å for  $x = 0.1, 0.3, 0.7$ , and 0.9, respectively.

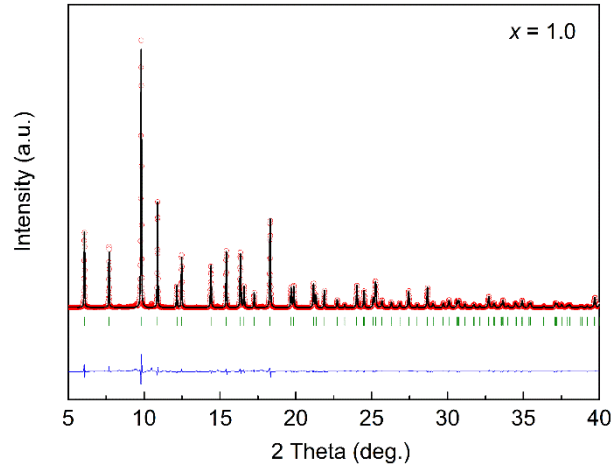

**Figure S3.** Rietveld refinement of SXRD patterns of tetragonal  $\text{BiCoO}_3$  ( $x = 1.0$  for  $(1-x)\text{PT}-x\text{BC}$ ) at room temperature. Observed (red circles), calculated (black line), and their difference profiles (bottom line) are shown. The Bragg reflection positions are indicated by the green ticks. The related wavelength ( $\lambda$ ) is  $0.500000 \text{ \AA}$

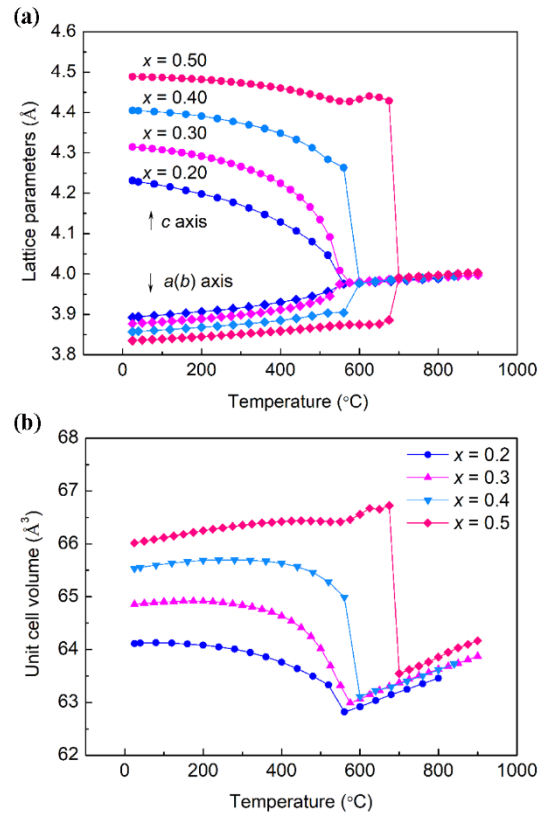

**Figure S4.** Structural parameters of (a)  $a(b)$ ,  $c$ , and (b) unit cell volume as a function of temperature for  $(1-x)\text{PT}-x\text{BC}$  ( $x = 0.2, 0.3, 0.4$ , and  $0.5$ ). The error bars are smaller than the symbols.

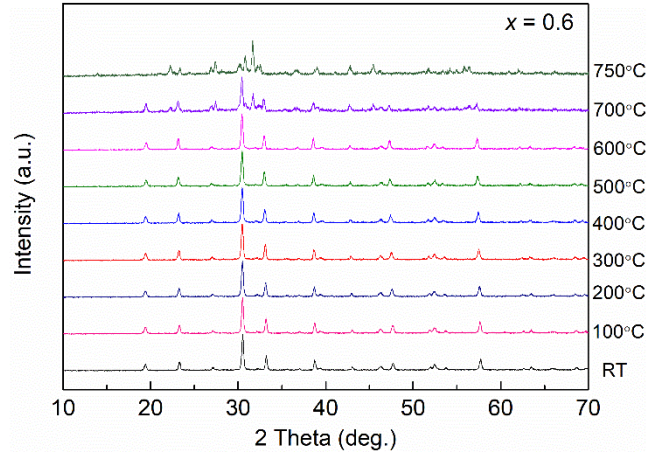

**Figure S5.** Temperature dependence of X-ray diffraction patterns of 0.4PbTiO<sub>3</sub>-0.6BiCoO<sub>3</sub>.

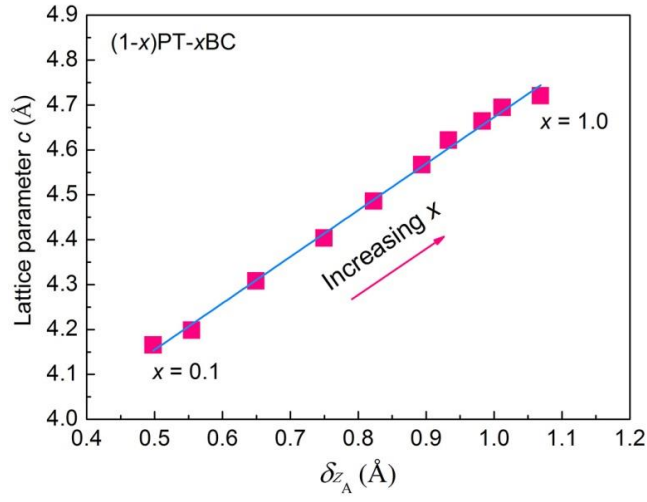

**Figure S6.** The coupling between the  $P_s$  displacement ( $\delta z_A$ ) and the lattice parameter  $c$  axis of  $(1-x)\text{PT}-x\text{BC}$  ( $x = 0.0 \sim 1.0$ ). The error bars are smaller than the symbols.

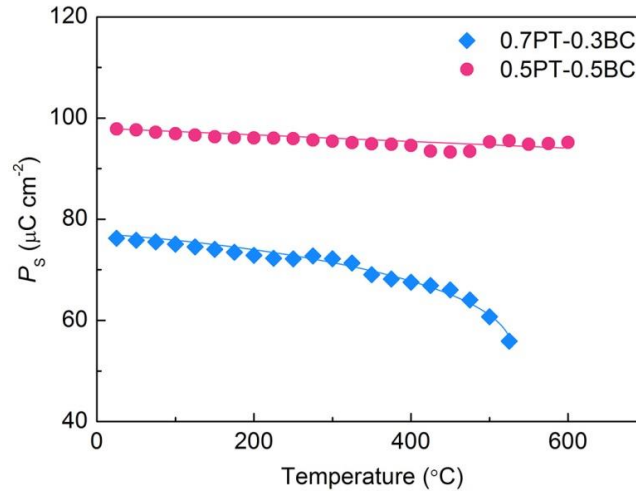

**Figure S7.** Temperature dependence of calculated  $P_s$  for 0.7PT-0.3BC and 0.5PT-0.5BC.

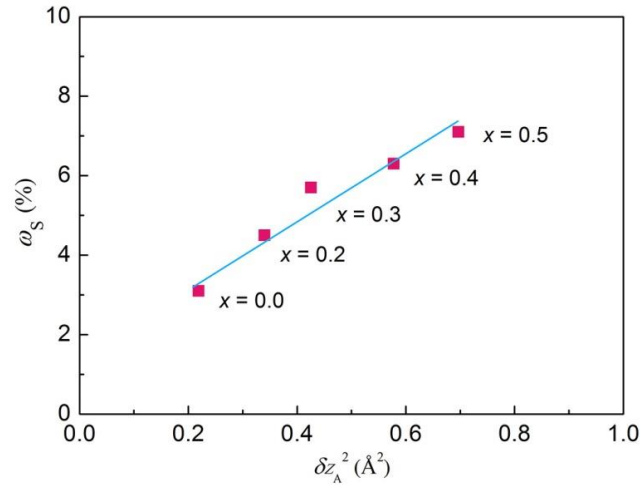

**Figure S8.** The correlation between the spontaneous volume ferroelectrostriction ( $\omega_s$ ) and  $P_s$  displacement ( $\delta z_A$ ).

There is a strong correlation of  $\omega_s = \alpha \delta z_A^2$  for (1-x)PT-xBC ( $x = 0.0, 0.2, 0.3, 0.4$ , and  $0.5$ ) ferroelectrics.

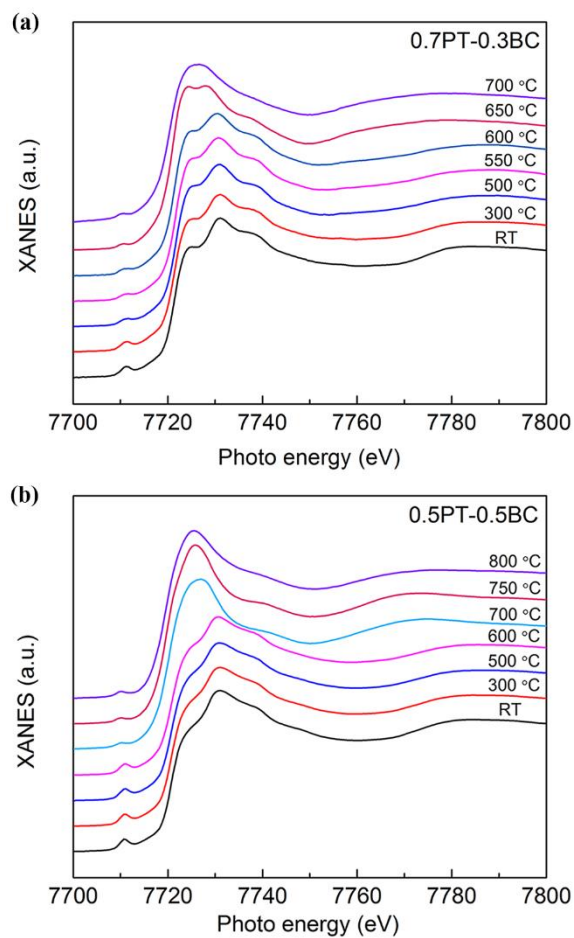

**Figure S9.** XANES structural analysis. Temperature dependence of Co K-edge XANES spectra for (a) 0.7PT-0.3BC and (b) 0.5PT-0.5BC.

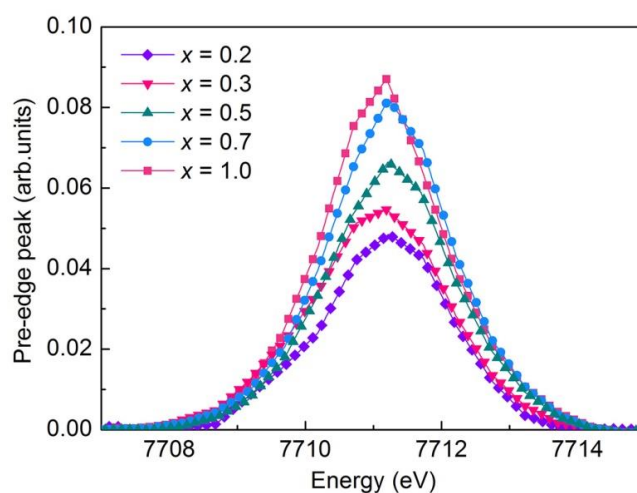

**Figure S10.** Composition dependence of Co K pre-edge peak for (1-x)PT-xBC ( $x = 0.2, 0.3, 0.5, 0.7$ , and  $1.0$ ) at RT.

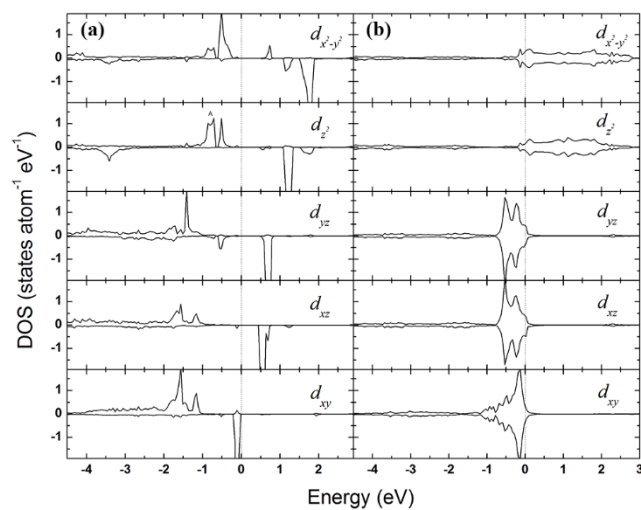

**Figure S11.** Calculated orbital projected DOS for 0.5PT-0.5BC in the ferroelectric (a) and the paraelectric (b) phases.

**Table S1.** The data of the CTE, volume contraction, and  $T_C$  of (1- $x$ )PT- $x$ BC.

| content                                 | $x = 0$ | $x = 0.2$ | $x = 0.3$ | $x = 0.4$ | $x = 0.5$ |
|-----------------------------------------|---------|-----------|-----------|-----------|-----------|
| $T_C$ (°C)                              | 490     | 560       | 575       | 600       | 700       |
| CTE ( $\times 10^{-5}/^\circ\text{C}$ ) | -1.99   | -3.78     | -5.24     | —         | —         |
| $\Delta V$                              | -1.29%  | -2.04%    | -2.97%    | -3.24%    | -4.76%    |

**Table S2.** Structural refinement results of NPD of 0.5PT-0.5BC at 5 K. O1 and O2 were refined by using anisotropic atomic displacement parameters ( $U_{11}$ ,  $U_{22}$ , and  $U_{33}$ ). Others are isotropic ones. The quality of the agreement between the observed and calculated profiles is indicated by the weighted  $R_{wp}$  and the goodness of fit  $\chi^2$ .

| atom  | site | $x$ | $y$ | $z$      | $U_{iso}/U_{ij}$                                                  |
|-------|------|-----|-----|----------|-------------------------------------------------------------------|
| Pb/Bi | 1a   | 0   | 0   | 0        | 0.02177                                                           |
| Co/Ti | 1b   | 0.5 | 0.5 | 0.597305 | 0.02456                                                           |
| O1    | 1b   | 0.5 | 0.5 | 0.178456 | 0.03044( $U_{11}$ )<br>0.03044( $U_{22}$ )<br>0.01287( $U_{33}$ ) |
| O2    | 2c   | 0.5 | 0   | 0.684938 | 0.01585( $U_{11}$ )<br>0.00963( $U_{22}$ )<br>0.02077( $U_{33}$ ) |

\*Space group  $P4mm$ ,  $a(b) = 3.82055(4)$  Å,  $c = 4.49313(2)$  Å,  $m_z$  (Co) = 3.24  $\mu\text{B}$ ,  $\chi^2 = 1.28$ ,  $R_{wp} = 6.82\%$ .
